# Supplementary material for: Challenges to Implementing Environmental-DNA Monitoring in Namibia
Source: Frontiers journal article supplement (doi:10.3389/fenvs.2021.773991), 2022-01-17
Supplement: Table_1.docx [file Table_1.docx]

**Table SI1. Details of the sampling sites (listed along a north to south transect)**

| Site location | Site Code | Source | Type | Sampling Date |
| --- | --- | --- | --- | --- |
| Endola | I1 | Ishana | W | May-18 |
| Ouhongo | I2 | Ishana | W | May-18 |
| Ohaingu | I3 | Ishana | W | May-18 |
| Omufitu | I4 | Ishana | W | May-18 |
| Okambebe | I5 | Ishana | W | May-18 |
| Onamhindi | I6 | Ishana | W | May-18 |
| Onamhindi | I7 | Ishana | W | Dec-17 |
| Endola | W | Hand-dug Well | W | May-18 |
| Okatana River | R1 | River | W | May-18 |
| Owambo River | R6 | River | S | Dec-17 |
| Spring | SP | Spring | W | Dec-17 |
| Pfanner Lake | P | Pan | W / S | Dec-17 |
| La Rochelle Estate Brook | B | Brook | W/S | Dec-17 |
| Canal at Grootfontein | C2 | Canal | S | Dec-17 |
| Canal at private entrance | C1 | Canal | W / S | Dec-17 |
| Omatako River Downstream | R5 | River | S | Dec-17 |
| Omatako Dam | RE4 | Reservoir | W/ S | Dec-17 |
| Omatako River Upstream | R2 | River | S | Dec-17 |
| Omatako Dam Upstream | R3 | River | W / S | Dec-17 |
| Von Bach Dam | RE2 | Reservoir | W / S | Dec-17 |
| Kleinwindhoek River | R4 | River | W / S | Dec-17 |
| Koch and Schutheiss at Dann Viljoen Game Reserve | RE1 | Reservoir | W / S | Dec-17 |
| Avis Dam | RE3 | Reservoir | W / S | Dec-17 |
| Windhoek Tap Water | TW | Tap Water | W | Dec-17 |

W=water, S=sediment, W / S=water and sediment
