# Supplementary material for: Challenges to Implementing Environmental-DNA Monitoring in Namibia
Source: Frontiers journal article supplement (doi:10.3389/fenvs.2021.773991), 2022-01-17
Supplement: Table_3.docx [file Table_3.docx]

**Table SI3: Primers used for PCR metabarcoding amplification**

| **Primer Name** | **Primer sequence** | **Reference** |
| --- | --- | --- |
| Nextera F tag | TCGTCGGCAGCGTCAGATGTGTATAAGAGACAG | Illumina Nextera protocol document 15027987 v01 |
| Nextera R tag | GTCTCGTGGGCTCGGAGATGTGTATAAGAGACAG |
| 515 F 16S rRNA | GTGCCAGCMGCCGCGGTAA | Caporaso *et al.* 2011 |
| 806 R 16S rRNA | GGACTACHVGGGTWTCTAAT |
| RBCL646 F | ATGCGTTGGAGAGARCGTTTC | Environment Agency document  SC140024/R |
| RBCL998 R | GATCACCTTCTAATTTACCWACAACTG |
| (COI F) mlCOlint Modified | GGWACWGGWTGAACWGTWTAYCC | Leray *et al.* 2013 |
| (COI R) HC02198 Original | TAAACTTCAGGGTGACCAAAAAATCA | Folmer *et al.* 1994 |
